# Supplementary material for: Ubiquitous Influence of Wildfire Emissions and Secondary Organic Aerosol on Summertime Atmospheric Aerosol in the Forested Great Lakes Region
Source: Copernicus journal article supplement (doi:10.5194/acp-2017-786), 2017-09-25
Supplement: Supplementary file [file acp-2017-786-RC1-supplement.pdf]

Gunsch et al. present observations of aerosol concentration and composition at the University of Michigan Biological Station (UMBS) for July 2014. The authors use a combination of a high-resolution time-of-flight aerosol mass spectrometer, single particle aerosol time-of-flight mass spectrometer, and combination scanning mobility particle sizer spectrometer and aerodynamic particle size spectrometer to investigate the aerosol characteristics between 0.01 – 2.5  $\mu\text{m}$  during this time period. The authors found four different air masses impacted the area during the time period: 2 air masses impacted by wildfires from Canada, 1 air mass impacted by cities south of UMBS, and 1 air mass from clean regions over Canada. The authors found an increase in particle number and mass, over the clean regime, for the air masses impacted by wildfires and cities; however, no matter where the air came from, it was always influenced by biomass burning. The paper provides important information about what influences the aerosol mass in a background, rural location, and is of value for *Atmospheric Chemistry and Physics* community; however, there are some concerns and some clarifications that need to be addressed first prior to publication.

### **Major Comments**

- 1) I'm wondering why the AMS data was not used more to help further validate the results from the single particle mass spectrometer, or to support some of the authors' hypotheses. For example, either PMF (Ulbrich et al., 2009), "poor-man's PMF" (Aiken et al., 2009; Zhang et al., 2005), or triangle plots of different fragments (Cubison et al., 2011; Hu et al., 2015; Ng et al., 2010) would further support the evidence of OA being strongly influenced by biomass burning, anthropogenic emissions, and biogenic emissions/chemistry (e.g., page 10, Lines 3 – 5 and page 11, lines 20 – 22). Without this support, speculations that biogenic emissions and chemistry leading to the very high O/C ratios observed is hard to

interpret (page 11, lines 20 – 22). Other studies found high O/C ratios due to photochemical aging of the biomass burning emissions and aerosol (Liu et al., 2016; Zhou et al., 2017), which may have led to the high O/C instead of OA production from biogenic emissions. Also, cloud processing of the gases and OA may lead to high O/C ratios, along with the SO<sub>4</sub> (Sullivan et al., 2016). A discussion either including these various processes or a discussion that argues why one process over the others leads to the high O/C ratios is needed.

- 2) Throughout the Sections 3.2 – 3.4, in the comparisons of the different aerosol regimes, the aerosol number mode is mentioned. The biomass burning mode is the same as the background mode, and the urban mode is smaller than both the biomass burning and background mode; however, the authors discuss how chemistry and accumulation are occurring during transport of the biomass burning and urban air masses. A discussion about why the modes are similar (or smaller) while chemistry and accumulation is occurring is necessary for the readers to better relate these two possibly contradictory processes.
- 3) A more in-depth analysis of some of the aerosol characteristics would improve the results and the paper. For example, page 12, lines 6 – 11, the authors very briefly discuss an accumulation of SO<sub>4</sub> into the biomass burning particles; however, these particles are coming from wildfires in Canada. A discussion about where this SO<sub>4</sub> comes from would be beneficial, as recent studies have found a minor role for biomass burning emissions SO<sub>4</sub> and unclear for SO<sub>2</sub> emissions (Collier et al., 2016; Liu et al., 2016, 2017). As another example, the authors found little NO<sub>3</sub> in the air masses impacted by urban regions (page 14, lines 7 – 10 and Figure 3), which is surprising with the NO<sub>x</sub> emissions and chemistry.

What would have led to the extremely low amounts, especially since other downwind sites have observed enhanced  $\text{NO}_3$  (Jimenez et al., 2009)?

### **Minor Comments**

- 1) Page 1, line 27: “The field site was also influenced . . .”. It is not clear in the abstract what the influences are before this line.
- 2) Page 2, line 21: Change leading primary particles to leading to primary particles
- 3) Page 2, line 22: Why is water included as a secondary species for aerosol?
- 4) Page 4, line 3: Any reason why Slowik et al. (2011) is not included in this comparison of SOA in Ontario?
- 5) Page 5, line 19: Please check the Jimenez and DeCarlo, 2017 citation. The website listed for this citation leads to Canadian Interagency Forest Fire Centre.
- 6) Page 11, line 1: superscript the minus sign
- 7) Page 11, line 12: Please change limit to limiting

## References

- Aiken, a. C., Salcedo, D., Cubison, M. J., Huffman, J. a., DeCarlo, P. F., Ulbrich, I. M., Docherty, K. S., Sueper, D., Kimmel, J. R., Worsnop, D. R., Trimborn, a., Northway, M., Stone, E. a., Schauer, J. J., Volkamer, R., Fortner, E., de Foy, B., Wang, J., Laskin, a., Shutthanandan, V., Zheng, J., Zhang, R., Gaffney, J., Marley, N. a., Paredes-Miranda, G., Arnott, W. P., Molina, L. T., Sosa, G. and Jimenez, J. L.: Mexico City aerosol analysis during MILAGRO using high resolution aerosol mass spectrometry at the urban supersite (T0) – Part 1: Fine particle composition and organic source apportionment, *Atmos. Chem. Phys. Discuss.*, 9(2), 8377–8427, doi:10.5194/acpd-9-8377-2009, 2009.
- Collier, S., Zhou, S., Onasch, T. B., Jaffe, D. A., Kleinman, L., Sedlacek, A. J., Briggs, N. L., Hee, J., Fortner, E., Shilling, J. E., Worsnop, D., Yokelson, R. J., Parworth, C., Ge, X., Xu, J., Butterfield, Z., Chand, D., Dubey, M. K., Pekour, M. S., Springston, S. and Zhang, Q.: Regional Influence of Aerosol Emissions from Wildfires Driven by Combustion Efficiency: Insights from the BBOP Campaign, *Environ. Sci. Technol.*, 50(16), 8613–8622, doi:10.1021/acs.est.6b01617, 2016.
- Cubison, M. J., Ortega, A. M., Hayes, P. L., Farmer, D. K., Day, D., Lechner, M. J., Brune, W. H., Apel, E., Diskin, G. S., Fisher, J. A., Fuelberg, H. E., Hecobian, A., Knapp, D. J., Mikoviny, T., Riemer, D., Sachse, G. W., Sessions, W., Weber, R. J., Weinheimer, A. J., Wisthaler, A. and Jimenez, J. L.: Effects of aging on organic aerosol from open biomass burning smoke in aircraft and laboratory studies, *Atmos. Chem. Phys.*, 11(23), 12049–12064, doi:doi:10.5194/acp-11-12049-2011, 2011.
- Hu, W. W., Campuzano-Jost, P., Palm, B. B., Day, D. A., Ortega, A. M., Hayes, P. L., Krechmer, J. E., Chen, Q., Kuwata, M., Liu, Y. J., de Sá, S. S., McKinney, K., Martin, S. T., Hu, M., Budisulistiorini, S. H., Riva, M., Surratt, J. D., St. Clair, J. M., Isaacman-Van Wertz, G., Yee, L. D., Goldstein, A. H., Carbone, S., Brito, J., Artaxo, P., de Gouw, J. A., Koss, A., Wisthaler, A., Mikoviny, T., Karl, T., Kaser, L., Jud, W., Hansel, A., Docherty, K. S., Alexander, M. L., Robinson, N. H., Coe, H., Allan, J. D., Canagaratna, M. R., Paulot, F. and Jimenez, J. L.: Characterization of a real-time tracer for isoprene epoxydiols-derived secondary organic aerosol (IEPOX-SOA) from aerosol mass spectrometer measurements, *Atmos. Chem. Phys.*, 15(20), 11807–11833, doi:10.5194/acp-15-11807-2015, 2015.
- Jimenez, J. L., Canagaratna, M. R., Donahue, N. M., Prevot, A. S. H., Zhang, Q., Kroll, J. H., DeCarlo, P. F., Allan, J. D., Coe, H., Ng, N. L., Aiken, A. C., Docherty, K. S., Ulbrich, I. M., Grieshop, A. P., Robinson, A. L., Duplissy, J., Smith, J. D., Wilson, K. R., Lanz, V. A., Hueglin, C., Sun, Y. L., Tian, J., Laaksonen, A., Raatikainen, T., Rautiainen, J., Vaattovaara, P., Ehn, M., Kulmala, M., Tomlinson, J. M., Collins, D. R., Cubison, M. J., Dunlea, E. J., Huffman, J. A., Onasch, T. B., Alfarra, M. R., Williams, P. I., Bower, K., Kondo, Y., Schneider, J., Drewnick, F., Borrmann, S., Weimer, S., Demerjian, K., Salcedo, D., Cottrell, L., Griffin, R., Takami, A., Miyoshi, T., Hatakeyama, S., Shimono, A., Sun, J. Y., Zhang, Y. M., Dzepina, K., Kimmel, J. R., Sueper, D., Jayne, J. T., Herndon, S. C., Trimborn, A. M., Williams, L. R., Wood, E. C., Middlebrook, A. M., Kolb, C. E., Baltensperger, U., Worsnop, D. R. and Worsnop, D. R.: Evolution of organic aerosols in the atmosphere., *Science*, 326(5959), 1525–1529, doi:10.1126/science.1180353, 2009.
- Liu, X., Zhang, Y., Huey, L. G., Yokelson, R. J., Wang, Y., Jimenez, J. L., Campuzano-Jost, P., Beyersdorf, A. J., Blake, D. R., Choi, Y., St. Clair, J. M., Crounse, J. D., Day, D. A., Diskin, G. S., Fried, A., Hall, S. R., Hanisco, T. F., King, L. E., Meinardi, S., Mikoviny, T., Palm, B. B.,

Peischl, J., Perring, A. E., Pollack, I. B., Ryerson, T. B., Sachse, G., Schwarz, J. P., Simpson, I. J., Tanner, D. J., Thornhill, K. L., Ullmann, K., Weber, R. J., Wennberg, P. O., Wisthaler, A., Wolfe, G. M. and Ziemba, L. D.: Agricultural fires in the southeastern U.S. during SEAC<sup>4</sup> RS: Emissions of trace gases and particles and evolution of ozone, reactive nitrogen, and organic aerosol, *J. Geophys. Res. Atmos.*, 121(12), 7383–7414, doi:10.1002/2016JD025040, 2016.

Liu, X., Huey, L. G., Yokelson, R. J., Selimovic, V., Simpson, I. J., Müller, M., Jimenez, J. L., Campuzano-Jost, P., Beyersdorf, A. J., Blake, D. R., Butterfield, Z., Choi, Y., Crounse, J. D., Day, D. A., Diskin, G. S., Dubey, M. K., Fortner, E., Hanisco, T. F., Hu, W., King, L. E., Kleinman, L., Meinardi, S., Mikoviny, T., Onasch, T. B., Palm, B. B., Peischl, J., Pollack, I. B., Ryerson, T. B., Sachse, G. W., Sedlacek, A. J., Shilling, J. E., Springston, S., St. Clair, J. M., Tanner, D. J., Teng, A. P., Wennberg, P. O., Wisthaler, A. and Wolfe, G. M.: Airborne measurements of western U.S. wildfire emissions: Comparison with prescribed burning and air quality implications, *J. Geophys. Res. Atmos.*, 122(11), 6108–6129, doi:10.1002/2016JD026315, 2017.

Ng, N. L., Canagaratna, M. R., Zhang, Q., Jimenez, J. L., Tian, J., Ulbrich, I. M., Kroll, J. H., Docherty, K. S., Chhabra, P. S., Bahreini, R., Murphy, S. M., Seinfeld, J. H., Hildebrandt, L., Donahue, N. M., Decarlo, P. F., Lanz, V. A., Prévôt, A. S. H., Dinar, E., Rudich, Y. and Worsnop, D. R.: Organic aerosol components observed in Northern Hemispheric datasets from Aerosol Mass Spectrometry, *Atmos. Chem. Phys.*, 10(10), 4625–4641, doi:10.5194/acp-10-4625-2010, 2010.

Slowik, J. G., Brook, J., Y.-W. Chang, R., Evans, G. J., Hayden, K., Jeong, C. H., LiS.-M., Liggió, J., Liu, P. S. K., McGuire, M., Mihele, C., Sjostedt, S., Vlasenko, A. and Abbatt, J. P. D.: Photochemical processing of organic aerosol at nearby continental sites: Contrast between urban plumes and regional aerosol, *Atmos. Chem. Phys.*, 11(6), 2991–3006, doi:10.5194/acp-11-2991-2011, 2011.

Sullivan, A. P., Hodas, N., Turpin, B. J., Skog, K., Keutsch, F. N., Gilardoni, S., Paglione, M., Rinaldi, M., Decesari, S., Facchini, M. C., Poulain, L., Herrmann, H., Wiedensohler, A., Nemitz, E., Twigg, M. M. and Collett Jr., J. L.: Evidence for ambient dark aqueous SOA formation in the Po Valley, Italy, *Atmos. Chem. Phys.*, 16(13), 8095–8108, doi:10.5194/acp-16-8095-2016, 2016.

Ulbrich, I. M., Canagaratna, M. R., Zhang, Q., Worsnop, D. R. and Jimenez, J. L.: Interpretation of Organic Components from Positive Matrix Factorization of Aerosol Mass Spectrometric Data., *Atmos. Chem. Phys.*, 9, 2891, doi:10.5194/acp-9-2891-2009, 2009.

Zhang, Q., Alfarra, M. R., Worsnop, D. R., James, D., Coe, H., Canagaratna, M. R. and Jimenez, J. L.: Deconvolution and Quantification of Hydrocarbon-like and Oxygenated Organic Aerosols Based on Aerosol Mass Spectrometry Deconvolution and Quantification of Hydrocarbon-like and Oxygenated Organic Aerosols Based on Aerosol Mass Spectrometry, *Environ. Sci. Technol.*, 39(13), 4938–4952, doi:10.1021/es048568l, 2005.

Zhou, S., Collier, S., Jaffe, D. A., Briggs, N. L., Hee, J., Sedlacek III, A. J., Kleinman, L., Onasch, T. B. and Zhang, Q.: Regional influence of wildfires on aerosol chemistry in the western US and insights into atmospheric aging of biomass burning organic aerosol, *Atmos. Chem. Phys.*, 17(3), 2477–2493, doi:10.5194/acp-17-2477-2017, 2017.
